# Supplementary figures and images for: Microwave-assisted synthesis, characterization, cell imaging of fluorescent carbon dots using l-asparagine as precursor
Source: Royal Society of Chemistry journal article supplement (doi:10.1039/c8nj05421e), 2019-01-01

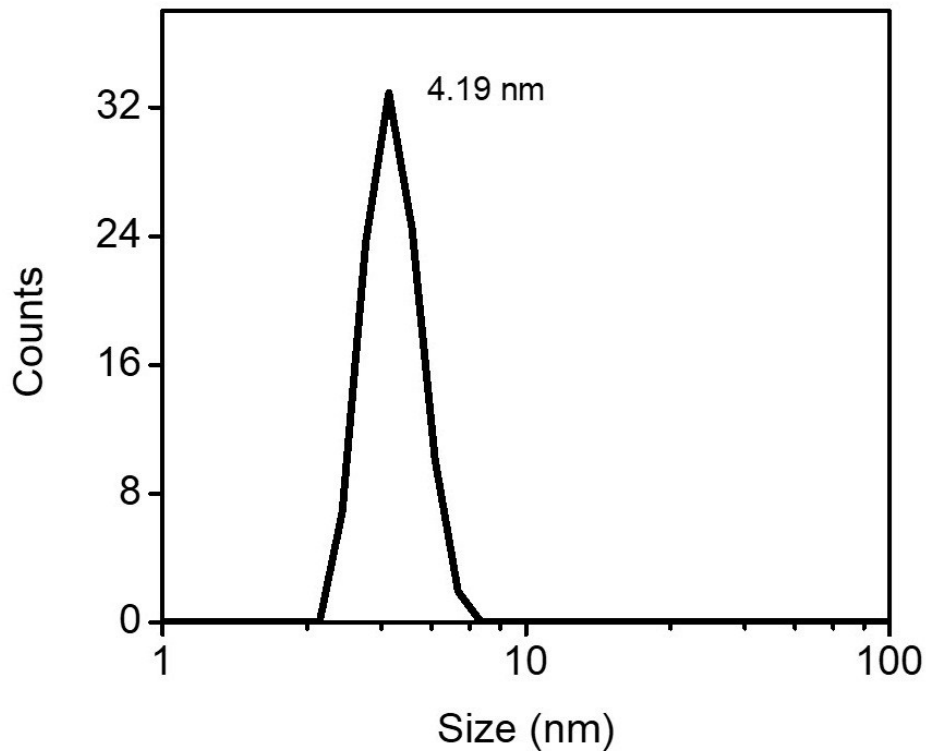

Supplement: c8nj05421e2.pdf [file c8nj05421e2.pdf]

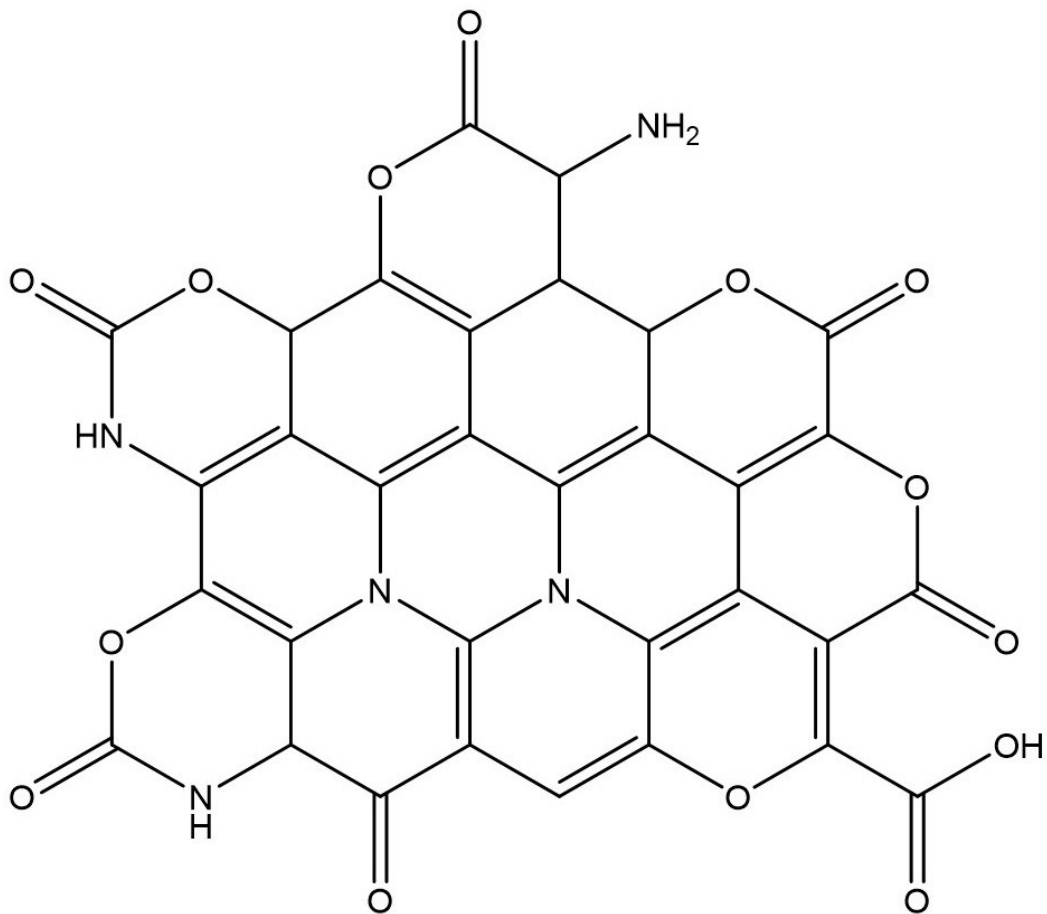

Supplement: c8nj05421e3.pdf [file c8nj05421e3.pdf]

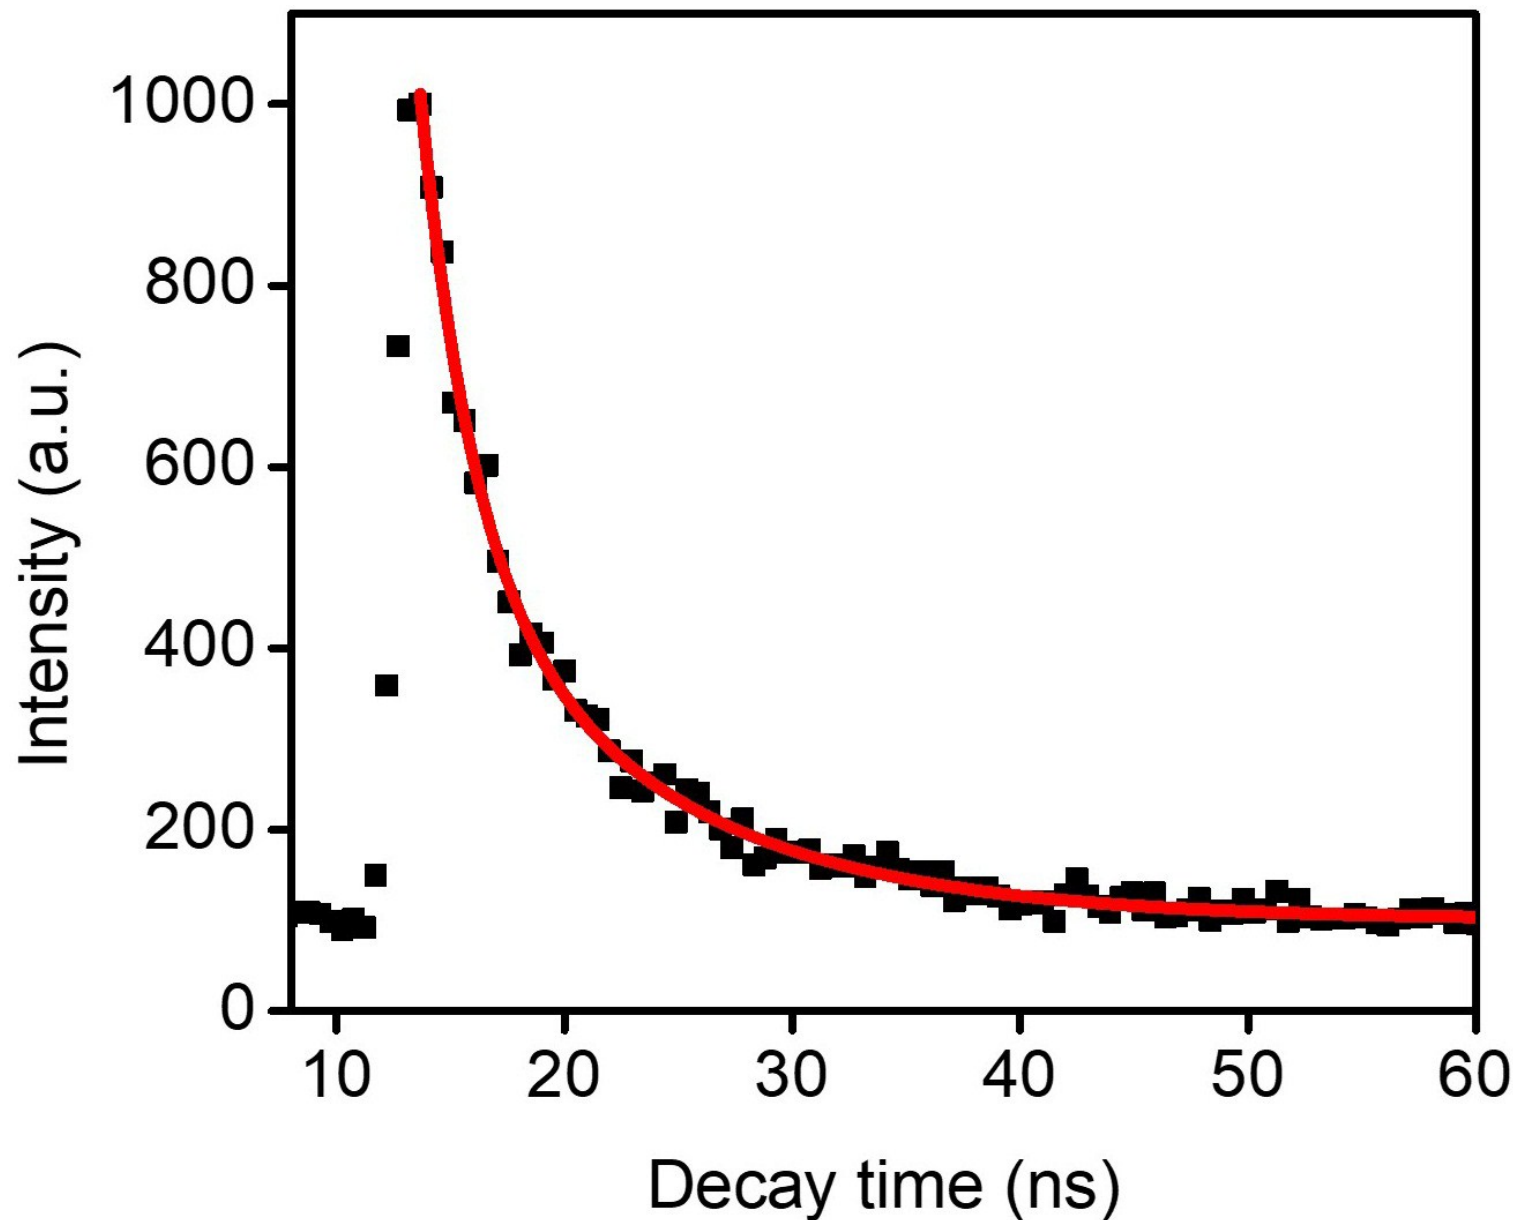

Supplement: c8nj05421e4.pdf [file c8nj05421e4.pdf]

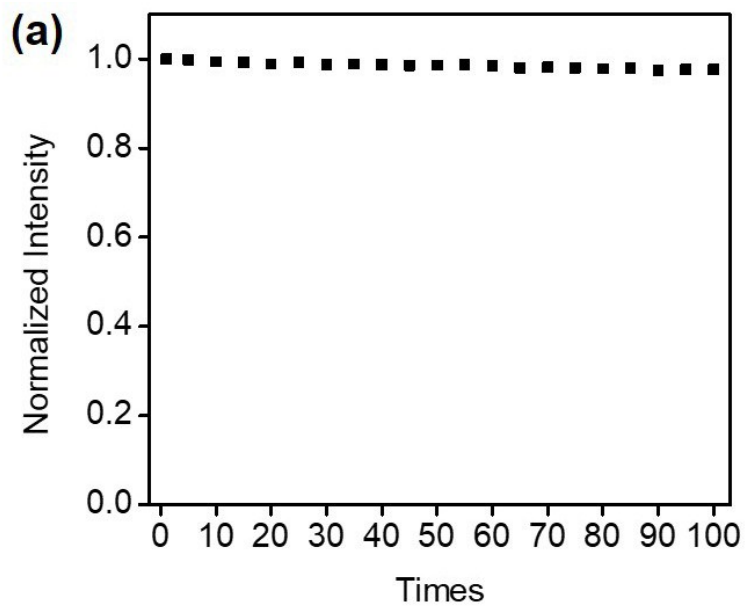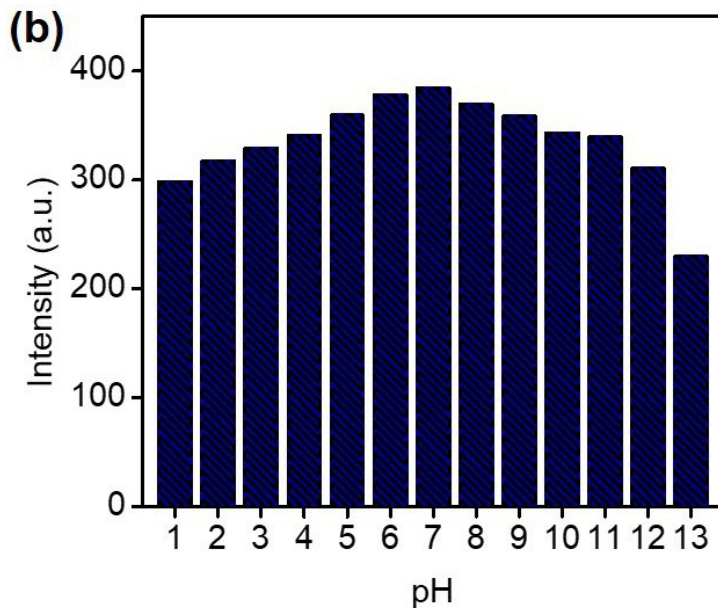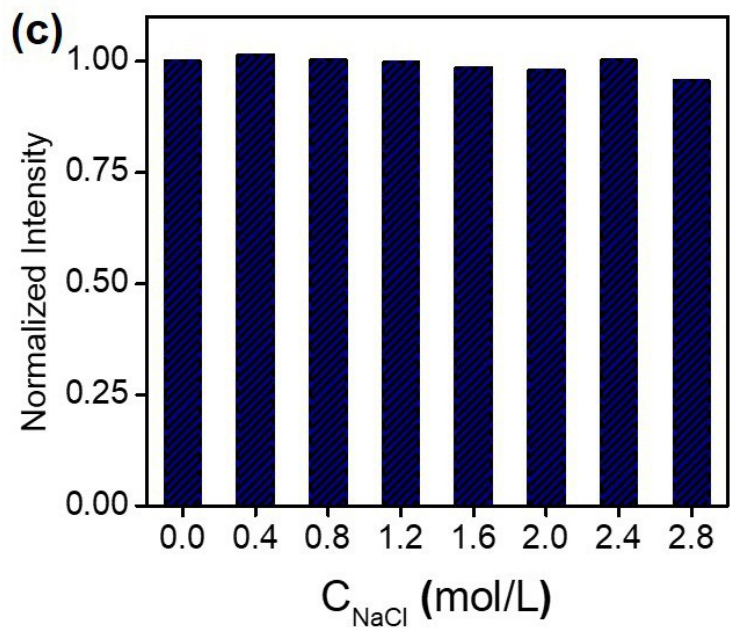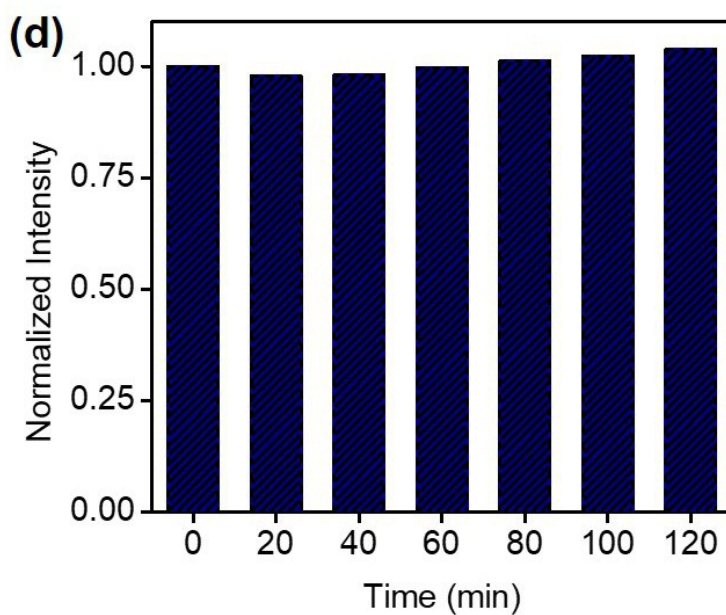

Supplement: c8nj05421e7.pdf [file c8nj05421e7.pdf]

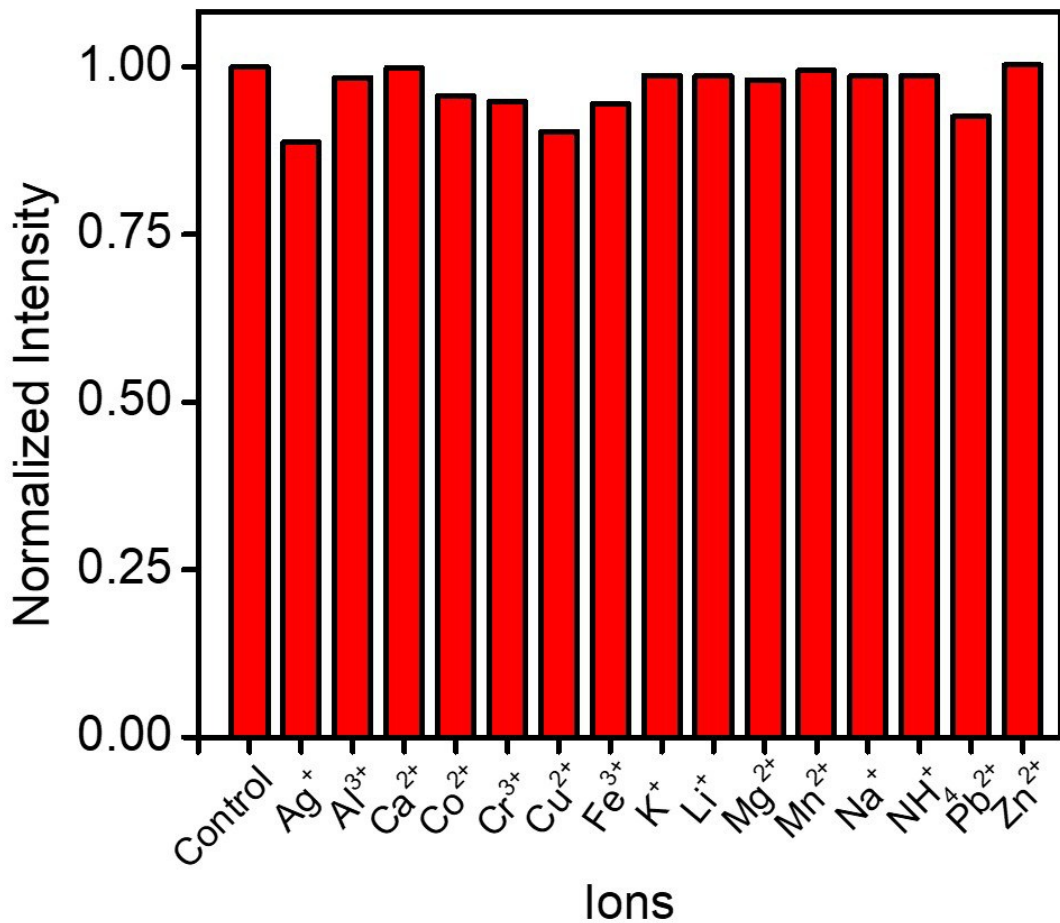

Supplement: c8nj05421e8.pdf [file c8nj05421e8.pdf]
